# Supplementary material
Source: publisher figshare collection journal article supplement (https://acs.figshare.com/ndownloader/files/4102714)
Supplement: Supplementary file 1 [file 4102714]

 
data_Ba2ThS6
_publ_requested_journal          Inorg.Chem.
_publ_contact_author_name        'professor James A. Ibers '
_publ_contact_author_address     
'Department of Chemistry, Northwestern University, Evanston, IL, United States'
_publ_contact_author_email       ibers@chem.northwestern.edu
_publ_contact_author_phone       '+1 847 467 1798'
_publ_contact_author_fax         '+1 847 491 7713'
loop_
_publ_author_name
_publ_author_address
'Ibers, James. A.'
'Department of Chemistry, Northwestern University, Evanston, IL, United States'
'Mesbah, Adel'
'Department of Chemistry, Northwestern University, Evanston, IL, United States'
'Ringe, Emilie'
'Department of Chemistry, Northwestern University, Evanston, IL, United States'
'Leb\`egue, S\'ebastien'
'CRM2 (UMR UHP-CNRS 7036), Universit\'e de Lorrain, FRANCE'
'Van Duyne, Richard. P.'
'Department of Chemistry, Northwestern University, Evanston, IL, United States'

_audit_creation_method           SHELXL-97
_chemical_name_systematic        
; 
 ? 
;
_chemical_name_common            Ba2ThS6
_chemical_melting_point          ?
_chemical_formula_moiety         ?
_chemical_formula_sum            'Ba2 S6 Th'
_chemical_formula_weight         699.08

loop_
_atom_type_symbol
_atom_type_description
_atom_type_scat_dispersion_real
_atom_type_scat_dispersion_imag
_atom_type_scat_source
S S 0.1246 0.1234 'International Tables Vol C Tables 4.2.6.8 and 6.1.1.4'
Ba Ba -0.3244 2.2819 'International Tables Vol C Tables 4.2.6.8 and 6.1.1.4'
Th Th -7.2400 8.8979 'International Tables Vol C Tables 4.2.6.8 and 6.1.1.4'

_symmetry_cell_setting           tetragonal
_symmetry_space_group_name_H-M   'P 42/n m c'
_symmetry_space_group_name_Hall  '-P 4ac 2a'

loop_
_symmetry_equiv_pos_as_xyz
'x, y, z'
'-x+1/2, -y+1/2, z'
'-y+1/2, x, z+1/2'
'y, -x+1/2, z+1/2'
'-x, y+1/2, -z'
'x+1/2, -y, -z'
'y+1/2, x+1/2, -z+1/2'
'-y, -x, -z+1/2'
'-x, -y, -z'
'x-1/2, y-1/2, -z'
'y-1/2, -x, -z-1/2'
'-y, x-1/2, -z-1/2'
'x, -y-1/2, z'
'-x-1/2, y, z'
'-y-1/2, -x-1/2, z-1/2'
'y, x, z-1/2'

_cell_length_a                   5.4810(2)
_cell_length_b                   5.4810(2)
_cell_length_c                   15.9860(6)
_cell_angle_alpha                90.00
_cell_angle_beta                 90.00
_cell_angle_gamma                90.00
_cell_volume                     480.24(3)
_cell_formula_units_Z            2
_cell_measurement_temperature    100(2)
_cell_measurement_reflns_used    1867
_cell_measurement_theta_min      2.55
_cell_measurement_theta_max      30.46

_exptl_crystal_description       ?
_exptl_crystal_colour            ?
_exptl_crystal_size_max          0.05
_exptl_crystal_size_mid          0.05
_exptl_crystal_size_min          0.03
_exptl_crystal_density_meas      ?
_exptl_crystal_density_diffrn    4.834
_exptl_crystal_density_method    'not measured'
_exptl_crystal_F_000             596
_exptl_absorpt_coefficient_mu    24.776
_exptl_absorpt_correction_type   numerical
_exptl_absorpt_correction_T_min  0.377
_exptl_absorpt_correction_T_max  0.514
_exptl_absorpt_process_details   'face indexed (SADABS; Sheldrick, 2008'

_exptl_special_details           
; 
 ? 
;

_diffrn_ambient_temperature      100(2)
_diffrn_radiation_wavelength     0.71073
_diffrn_radiation_type           MoK\a
_diffrn_radiation_source         'fine-focus sealed tube'
_diffrn_radiation_monochromator  graphite
_diffrn_measurement_device_type  ?
_diffrn_measurement_method       ?
_diffrn_detector_area_resol_mean ?
_diffrn_reflns_number            10180
_diffrn_reflns_av_R_equivalents  0.0503
_diffrn_reflns_av_sigmaI/netI    0.0143
_diffrn_reflns_limit_h_min       -7
_diffrn_reflns_limit_h_max       7
_diffrn_reflns_limit_k_min       -7
_diffrn_reflns_limit_k_max       7
_diffrn_reflns_limit_l_min       -22
_diffrn_reflns_limit_l_max       22
_diffrn_reflns_theta_min         2.55
_diffrn_reflns_theta_max         30.46
_reflns_number_total             438
_reflns_number_gt                363
_reflns_threshold_expression     >2sigma(I)

_computing_data_collection       'APEX2 (Bruker, 2009)'
_computing_cell_refinement       'SAINT (Bruker, 2009)'
_computing_data_reduction        'SAINT (Bruker, 2009)'
_computing_structure_solution    'SHELXS-97 (Sheldrick, 2008)'
_computing_structure_refinement  'SHELXL-97 (Sheldrick, 2008)'
_computing_molecular_graphics    ?
_computing_publication_material  ?

_refine_special_details          
; 
 Refinement of F^2^ against ALL reflections.  The weighted R-factor wR and 
 goodness of fit S are based on F^2^, conventional R-factors R are based 
 on F, with F set to zero for negative F^2^. The threshold expression of 
 F^2^ > 2sigma(F^2^) is used only for calculating R-factors(gt) etc. and is 
 not relevant to the choice of reflections for refinement.  R-factors based 
 on F^2^ are statistically about twice as large as those based on F, and R- 
 factors based on ALL data will be even larger. 
;

_refine_ls_structure_factor_coef Fsqd
_refine_ls_matrix_type           full
_refine_ls_weighting_scheme      calc
_refine_ls_weighting_details     
; calc 
 [1.00000+0.00000exp(0.00(sin\q/\l)^2^)]/ 
   [\s^2^(Fo^2^)+0.0000+0.0000*P+(0.0183P)^2^+0.0000sin\q/\l] 
 where P = 1.00000Fo^2^ + 0.00000Fc^2^ 
;
_atom_sites_solution_primary     direct
_atom_sites_solution_secondary   difmap
_atom_sites_solution_hydrogens   .
_refine_ls_hydrogen_treatment    .
_refine_ls_extinction_method     SHELXL
_refine_ls_extinction_coef       0.00074(17)
_refine_ls_extinction_expression Fc^*^=kFc[1+0.001xFc^2^\l^3^/sin(2\q)]^-1/4^
_refine_ls_number_reflns         438
_refine_ls_number_parameters     18
_refine_ls_number_restraints     0
_refine_ls_R_factor_all          0.0270
_refine_ls_R_factor_gt           0.0187
_refine_ls_wR_factor_ref         0.0401
_refine_ls_wR_factor_gt          0.0378
_refine_ls_goodness_of_fit_ref   1.160
_refine_ls_restrained_S_all      1.160
_refine_ls_shift/su_max          0.000
_refine_ls_shift/su_mean         0.000

loop_
_atom_site_label
_atom_site_type_symbol
_atom_site_fract_x
_atom_site_fract_y
_atom_site_fract_z
_atom_site_U_iso_or_equiv
_atom_site_adp_type
_atom_site_occupancy
_atom_site_symmetry_multiplicity
_atom_site_calc_flag
_atom_site_refinement_flags
_atom_site_disorder_assembly
_atom_site_disorder_group
Th1 Th 0.7500 0.2500 0.7500 0.00498(11) Uani 1 8 d S . .
Ba1 Ba 0.7500 0.2500 0.11287(2) 0.00701(12) Uani 1 4 d S . .
S1 S 0.2500 0.5586(2) 0.08160(8) 0.0079(2) Uani 1 2 d S . .
S2 S 0.2500 0.2500 0.27764(13) 0.0086(3) Uani 1 4 d S . .

loop_
_atom_site_aniso_label
_atom_site_aniso_U_11
_atom_site_aniso_U_22
_atom_site_aniso_U_33
_atom_site_aniso_U_23
_atom_site_aniso_U_13
_atom_site_aniso_U_12
Th1 0.00442(13) 0.00442(13) 0.00609(18) 0.000 0.000 0.000
Ba1 0.0064(2) 0.0059(2) 0.0088(2) 0.000 0.000 0.000
S1 0.0080(6) 0.0062(6) 0.0095(6) -0.0005(5) 0.000 0.000
S2 0.0107(8) 0.0050(8) 0.0101(8) 0.000 0.000 0.000

_geom_special_details            
; 
 All esds (except the esd in the dihedral angle between two l.s. planes) 
 are estimated using the full covariance matrix.  The cell esds are taken 
 into account individually in the estimation of esds in distances, angles 
 and torsion angles; correlations between esds in cell parameters are only 
 used when they are defined by crystal symmetry.  An approximate (isotropic) 
 treatment of cell esds is used for estimating esds involving l.s. planes. 
;

loop_
_geom_bond_atom_site_label_1
_geom_bond_atom_site_label_2
_geom_bond_distance
_geom_bond_site_symmetry_2
_geom_bond_publ_flag
Th1 S2 2.7759(3) 3_655 ?
Th1 S2 2.7759(3) 9_656 ?
Th1 S2 2.7759(3) 3 ?
Th1 S2 2.7759(3) 9_666 ?
Th1 S1 2.8891(13) 4 ?
Th1 S1 2.8891(13) 9_666 ?
Th1 S1 2.8891(13) 3_655 ?
Th1 S1 2.8891(13) 10_656 ?
Th1 Ba1 4.4527(2) 9_766 ?
Th1 Ba1 4.4527(2) 3_545 ?
Th1 Ba1 4.4527(2) 9_656 ?
Th1 Ba1 4.4527(2) 3_655 ?
Ba1 S2 3.2518(11) 11_666 ?
Ba1 S2 3.2518(11) 11_656 ?
Ba1 S1 3.2591(7) 2 ?
Ba1 S1 3.2591(7) 1_655 ?
Ba1 S1 3.2591(7) 2_655 ?
Ba1 S1 3.2591(7) . ?
Ba1 S1 3.2810(13) 10_655 ?
Ba1 S1 3.2810(13) 9_665 ?
Ba1 Ba1 4.3844(8) 11_666 ?
Ba1 Th1 4.4527(2) 9_766 ?
Ba1 Th1 4.4527(2) 9_656 ?
Ba1 Th1 4.4527(2) 9_756 ?
S1 S1 2.098(2) 2_565 ?
S1 Th1 2.8891(13) 9_666 ?
S1 Ba1 3.2591(7) 1_455 ?
S1 Ba1 3.2810(13) 9_665 ?
S2 Th1 2.7759(3) 9_656 ?
S2 Th1 2.7759(3) 9_666 ?
S2 Ba1 3.2518(11) 11_666 ?
S2 Ba1 3.2518(11) 11_566 ?

loop_
_geom_angle_atom_site_label_1
_geom_angle_atom_site_label_2
_geom_angle_atom_site_label_3
_geom_angle
_geom_angle_site_symmetry_1
_geom_angle_site_symmetry_3
_geom_angle_publ_flag
S2 Th1 S2 91.452(13) 3_655 9_656 ?
S2 Th1 S2 161.68(8) 3_655 3 ?
S2 Th1 S2 91.452(13) 9_656 3 ?
S2 Th1 S2 91.452(13) 3_655 9_666 ?
S2 Th1 S2 161.68(8) 9_656 9_666 ?
S2 Th1 S2 91.452(13) 3 9_666 ?
S2 Th1 S1 120.45(5) 3_655 4 ?
S2 Th1 S1 81.47(4) 9_656 4 ?
S2 Th1 S1 77.87(5) 3 4 ?
S2 Th1 S1 81.47(4) 9_666 4 ?
S2 Th1 S1 81.47(4) 3_655 9_666 ?
S2 Th1 S1 120.45(5) 9_656 9_666 ?
S2 Th1 S1 81.47(4) 3 9_666 ?
S2 Th1 S1 77.87(5) 9_666 9_666 ?
S1 Th1 S1 150.25(3) 4 9_666 ?
S2 Th1 S1 77.87(5) 3_655 3_655 ?
S2 Th1 S1 81.47(4) 9_656 3_655 ?
S2 Th1 S1 120.45(5) 3 3_655 ?
S2 Th1 S1 81.47(4) 9_666 3_655 ?
S1 Th1 S1 42.58(5) 4 3_655 ?
S1 Th1 S1 150.25(3) 9_666 3_655 ?
S2 Th1 S1 81.47(4) 3_655 10_656 ?
S2 Th1 S1 77.87(5) 9_656 10_656 ?
S2 Th1 S1 81.47(4) 3 10_656 ?
S2 Th1 S1 120.45(5) 9_666 10_656 ?
S1 Th1 S1 150.25(3) 4 10_656 ?
S1 Th1 S1 42.58(5) 9_666 10_656 ?
S1 Th1 S1 150.25(3) 3_655 10_656 ?
S2 Th1 Ba1 46.69(2) 3_655 9_766 ?
S2 Th1 Ba1 133.31(2) 9_656 9_766 ?
S2 Th1 Ba1 121.96(3) 3 9_766 ?
S2 Th1 Ba1 58.04(3) 9_666 9_766 ?
S1 Th1 Ba1 133.014(14) 4 9_766 ?
S1 Th1 Ba1 46.986(14) 9_666 9_766 ?
S1 Th1 Ba1 103.609(19) 3_655 9_766 ?
S1 Th1 Ba1 76.391(19) 10_656 9_766 ?
S2 Th1 Ba1 133.31(2) 3_655 3_545 ?
S2 Th1 Ba1 46.69(2) 9_656 3_545 ?
S2 Th1 Ba1 58.04(3) 3 3_545 ?
S2 Th1 Ba1 121.96(3) 9_666 3_545 ?
S1 Th1 Ba1 46.986(14) 4 3_545 ?
S1 Th1 Ba1 133.014(14) 9_666 3_545 ?
S1 Th1 Ba1 76.391(19) 3_655 3_545 ?
S1 Th1 Ba1 103.609(19) 10_656 3_545 ?
Ba1 Th1 Ba1 180.0 9_766 3_545 ?
S2 Th1 Ba1 121.96(3) 3_655 9_656 ?
S2 Th1 Ba1 58.04(3) 9_656 9_656 ?
S2 Th1 Ba1 46.69(2) 3 9_656 ?
S2 Th1 Ba1 133.31(2) 9_666 9_656 ?
S1 Th1 Ba1 103.609(19) 4 9_656 ?
S1 Th1 Ba1 76.391(19) 9_666 9_656 ?
S1 Th1 Ba1 133.014(14) 3_655 9_656 ?
S1 Th1 Ba1 46.986(14) 10_656 9_656 ?
Ba1 Th1 Ba1 121.013(9) 9_766 9_656 ?
Ba1 Th1 Ba1 58.987(9) 3_545 9_656 ?
S2 Th1 Ba1 58.04(3) 3_655 3_655 ?
S2 Th1 Ba1 121.96(3) 9_656 3_655 ?
S2 Th1 Ba1 133.31(2) 3 3_655 ?
S2 Th1 Ba1 46.69(2) 9_666 3_655 ?
S1 Th1 Ba1 76.391(19) 4 3_655 ?
S1 Th1 Ba1 103.609(19) 9_666 3_655 ?
S1 Th1 Ba1 46.986(14) 3_655 3_655 ?
S1 Th1 Ba1 133.014(14) 10_656 3_655 ?
Ba1 Th1 Ba1 58.987(9) 9_766 3_655 ?
Ba1 Th1 Ba1 121.013(9) 3_545 3_655 ?
Ba1 Th1 Ba1 180.0 9_656 3_655 ?
S2 Ba1 S2 114.87(6) 11_666 11_656 ?
S2 Ba1 S1 121.33(2) 11_666 2 ?
S2 Ba1 S1 69.21(2) 11_656 2 ?
S2 Ba1 S1 69.21(2) 11_666 1_655 ?
S2 Ba1 S1 121.33(2) 11_656 1_655 ?
S1 Ba1 S1 162.36(5) 2 1_655 ?
S2 Ba1 S1 121.33(2) 11_666 2_655 ?
S2 Ba1 S1 69.21(2) 11_656 2_655 ?
S1 Ba1 S1 114.47(4) 2 2_655 ?
S1 Ba1 S1 62.54(4) 1_655 2_655 ?
S2 Ba1 S1 69.21(2) 11_666 . ?
S2 Ba1 S1 121.33(2) 11_656 . ?
S1 Ba1 S1 62.54(4) 2 . ?
S1 Ba1 S1 114.47(4) 1_655 . ?
S1 Ba1 S1 162.36(5) 2_655 . ?
S2 Ba1 S1 141.21(4) 11_666 10_655 ?
S2 Ba1 S1 103.92(4) 11_656 10_655 ?
S1 Ba1 S1 71.87(3) 2 10_655 ?
S1 Ba1 S1 91.18(2) 1_655 10_655 ?
S1 Ba1 S1 71.87(3) 2_655 10_655 ?
S1 Ba1 S1 91.18(2) . 10_655 ?
S2 Ba1 S1 103.92(4) 11_666 9_665 ?
S2 Ba1 S1 141.21(4) 11_656 9_665 ?
S1 Ba1 S1 91.18(2) 2 9_665 ?
S1 Ba1 S1 71.87(3) 1_655 9_665 ?
S1 Ba1 S1 91.18(2) 2_655 9_665 ?
S1 Ba1 S1 71.87(3) . 9_665 ?
S1 Ba1 S1 37.29(4) 10_655 9_665 ?
S2 Ba1 Ba1 57.43(3) 11_666 11_666 ?
S2 Ba1 Ba1 57.43(3) 11_656 11_666 ?
S1 Ba1 Ba1 98.82(2) 2 11_666 ?
S1 Ba1 Ba1 98.82(2) 1_655 11_666 ?
S1 Ba1 Ba1 98.82(2) 2_655 11_666 ?
S1 Ba1 Ba1 98.82(2) . 11_666 ?
S1 Ba1 Ba1 161.36(2) 10_655 11_666 ?
S1 Ba1 Ba1 161.36(2) 9_665 11_666 ?
S2 Ba1 Th1 38.399(5) 11_666 9_766 ?
S2 Ba1 Th1 104.70(2) 11_656 9_766 ?
S1 Ba1 Th1 155.85(2) 2 9_766 ?
S1 Ba1 Th1 40.40(2) 1_655 9_766 ?
S1 Ba1 Th1 82.959(19) 2_655 9_766 ?
S1 Ba1 Th1 105.88(2) . 9_766 ?
S1 Ba1 Th1 131.548(13) 10_655 9_766 ?
S1 Ba1 Th1 105.649(16) 9_665 9_766 ?
Ba1 Ba1 Th1 60.506(5) 11_666 9_766 ?
S2 Ba1 Th1 104.70(2) 11_666 9_656 ?
S2 Ba1 Th1 38.399(5) 11_656 9_656 ?
S1 Ba1 Th1 40.40(2) 2 9_656 ?
S1 Ba1 Th1 155.85(2) 1_655 9_656 ?
S1 Ba1 Th1 105.88(2) 2_655 9_656 ?
S1 Ba1 Th1 82.959(19) . 9_656 ?
S1 Ba1 Th1 105.649(16) 10_655 9_656 ?
S1 Ba1 Th1 131.548(13) 9_665 9_656 ?
Ba1 Ba1 Th1 60.506(5) 11_666 9_656 ?
Th1 Ba1 Th1 121.013(9) 9_766 9_656 ?
S2 Ba1 Th1 104.70(2) 11_666 9_756 ?
S2 Ba1 Th1 38.399(5) 11_656 9_756 ?
S1 Ba1 Th1 105.88(2) 2 9_756 ?
S1 Ba1 Th1 82.959(19) 1_655 9_756 ?
S1 Ba1 Th1 40.40(2) 2_655 9_756 ?
S1 Ba1 Th1 155.85(2) . 9_756 ?
S1 Ba1 Th1 105.649(16) 10_655 9_756 ?
S1 Ba1 Th1 131.548(13) 9_665 9_756 ?
Ba1 Ba1 Th1 60.506(5) 11_666 9_756 ?
Th1 Ba1 Th1 75.973(4) 9_766 9_756 ?
Th1 Ba1 Th1 75.973(4) 9_656 9_756 ?
S1 S1 Th1 68.71(2) 2_565 9_666 ?
S1 S1 Ba1 121.268(18) 2_565 . ?
Th1 S1 Ba1 92.61(3) 9_666 . ?
S1 S1 Ba1 121.268(18) 2_565 1_455 ?
Th1 S1 Ba1 92.61(3) 9_666 1_455 ?
Ba1 S1 Ba1 114.47(4) . 1_455 ?
S1 S1 Ba1 71.36(2) 2_565 9_665 ?
Th1 S1 Ba1 140.07(4) 9_666 9_665 ?
Ba1 S1 Ba1 108.13(3) . 9_665 ?
Ba1 S1 Ba1 108.13(3) 1_455 9_665 ?
Th1 S2 Th1 161.68(8) 9_656 9_666 ?
Th1 S2 Ba1 94.915(18) 9_656 11_666 ?
Th1 S2 Ba1 94.915(18) 9_666 11_666 ?
Th1 S2 Ba1 94.915(18) 9_656 11_566 ?
Th1 S2 Ba1 94.915(18) 9_666 11_566 ?
Ba1 S2 Ba1 114.87(6) 11_666 11_566 ?

_diffrn_measured_fraction_theta_max 1.000
_diffrn_reflns_theta_full        30.46
_diffrn_measured_fraction_theta_full 1.000
_refine_diff_density_max         1.579
_refine_diff_density_min         -0.820
_refine_diff_density_rms         0.209

data_Ba2US6 
 
_audit_creation_method            SHELXL-97 
_chemical_name_systematic 
; 
 ? 
; 
_chemical_name_common             'Ba2US6' 
_chemical_melting_point           ? 
_chemical_formula_moiety          ?
_chemical_formula_sum 
 'Ba2 S6 U' 
_chemical_formula_weight          705.07 
 
loop_ 
 _atom_type_symbol 
 _atom_type_description 
 _atom_type_scat_dispersion_real 
 _atom_type_scat_dispersion_imag 
 _atom_type_scat_source 
 'S'  'S'   0.1246   0.1234 
 'International Tables Vol C Tables 4.2.6.8 and 6.1.1.4' 
 'Ba'  'Ba'  -0.3244   2.2819 
 'International Tables Vol C Tables 4.2.6.8 and 6.1.1.4' 
 'U'  'U'  -9.6767   9.6646 
 'International Tables Vol C Tables 4.2.6.8 and 6.1.1.4' 
 
_symmetry_cell_setting            'tetragonal' 
_symmetry_space_group_name_H-M    'P 42/n m c' 
_symmetry_space_group_name_Hall     '-P 4ac 2a' 
 
loop_ 
 _symmetry_equiv_pos_as_xyz 
 'x, y, z' 
 '-x+1/2, -y+1/2, z' 
 '-y+1/2, x, z+1/2' 
 'y, -x+1/2, z+1/2' 
 '-x, y+1/2, -z' 
 'x+1/2, -y, -z' 
 'y+1/2, x+1/2, -z+1/2' 
 '-y, -x, -z+1/2' 
 '-x, -y, -z' 
 'x-1/2, y-1/2, -z' 
 'y-1/2, -x, -z-1/2' 
 '-y, x-1/2, -z-1/2' 
 'x, -y-1/2, z' 
 '-x-1/2, y, z' 
 '-y-1/2, -x-1/2, z-1/2' 
 'y, x, z-1/2' 
 
_cell_length_a                    5.4145(2) 
_cell_length_b                    5.4145(2) 
_cell_length_c                    15.7322(5) 
_cell_angle_alpha                 90.00 
_cell_angle_beta                  90.00 
_cell_angle_gamma                 90.00 
_cell_volume                      461.22(3) 
_cell_formula_units_Z             2 
_cell_measurement_temperature     100(2) 
_cell_measurement_reflns_used     4703 
_cell_measurement_theta_min       2.59  
_cell_measurement_theta_max       36.36 
 
_exptl_crystal_description        ? 
_exptl_crystal_colour             ? 
_exptl_crystal_size_max           0.07 
_exptl_crystal_size_mid           0.06 
_exptl_crystal_size_min           0.06 
_exptl_crystal_density_meas       ? 
_exptl_crystal_density_diffrn     5.077 
_exptl_crystal_density_method     'not measured' 
_exptl_crystal_F_000              600 
_exptl_absorpt_coefficient_mu     27.229 
_exptl_absorpt_correction_type    numerical 
_exptl_absorpt_correction_T_min   0.248
_exptl_absorpt_correction_T_max   0.301
_exptl_absorpt_process_details    'face indexed (SADABS; Sheldrick, 2008' 
 
_exptl_special_details 
; 
 ? 
; 
 
_diffrn_ambient_temperature       100(2) 
_diffrn_radiation_wavelength      0.71073 
_diffrn_radiation_type            MoK\a 
_diffrn_radiation_source          'fine-focus sealed tube' 
_diffrn_radiation_monochromator   graphite 
_diffrn_measurement_device_type   ? 
_diffrn_measurement_method        ? 
_diffrn_detector_area_resol_mean  ? 
_diffrn_reflns_number             14681 
_diffrn_reflns_av_R_equivalents   0.0296 
_diffrn_reflns_av_sigmaI/netI     0.0096 
_diffrn_reflns_limit_h_min        -9 
_diffrn_reflns_limit_h_max        9 
_diffrn_reflns_limit_k_min        -5 
_diffrn_reflns_limit_k_max        9 
_diffrn_reflns_limit_l_min        -26 
_diffrn_reflns_limit_l_max        26 
_diffrn_reflns_theta_min          2.59 
_diffrn_reflns_theta_max          36.36 
_reflns_number_total              656 
_reflns_number_gt                 581 
_reflns_threshold_expression      >2sigma(I) 
 
_computing_data_collection        'APEX2 (Bruker, 2009)'
_computing_cell_refinement        'SAINT (Bruker, 2009)'     
_computing_data_reduction         'SAINT (Bruker, 2009)'     
_computing_structure_solution     'SHELXS-97 (Sheldrick, 2008)' 
_computing_structure_refinement   'SHELXL-97 (Sheldrick, 2008)' 
_computing_molecular_graphics     ? 
_computing_publication_material   ? 
 
_refine_special_details 
; 
 Refinement of F^2^ against ALL reflections.  The weighted R-factor wR and 
 goodness of fit S are based on F^2^, conventional R-factors R are based 
 on F, with F set to zero for negative F^2^. The threshold expression of 
 F^2^ > 2sigma(F^2^) is used only for calculating R-factors(gt) etc. and is 
 not relevant to the choice of reflections for refinement.  R-factors based 
 on F^2^ are statistically about twice as large as those based on F, and R- 
 factors based on ALL data will be even larger. 
; 
 
_refine_ls_structure_factor_coef  Fsqd  
_refine_ls_matrix_type            full 
_refine_ls_weighting_scheme       calc  
_refine_ls_weighting_details 
; calc 
 [1.00000+0.00000exp(0.00(sin\q/\l)^2^)]/ 
   [\s^2^(Fo^2^)+0.0000+0.0000*P+(0.0106P)^2^+0.0000sin\q/\l] 
 where P = 1.00000Fo^2^ + 0.00000Fc^2^ 
; 
_atom_sites_solution_primary      direct 
_atom_sites_solution_secondary    difmap 
_atom_sites_solution_hydrogens    . 
_refine_ls_hydrogen_treatment     . 
_refine_ls_extinction_method      SHELXL 
_refine_ls_extinction_coef        0.0029(2) 
_refine_ls_extinction_expression 
 'Fc^*^=kFc[1+0.001xFc^2^\l^3^/sin(2\q)]^-1/4^' 
_refine_ls_number_reflns          656 
_refine_ls_number_parameters      18 
_refine_ls_number_restraints      0 
_refine_ls_R_factor_all           0.0183 
_refine_ls_R_factor_gt            0.0144 
_refine_ls_wR_factor_ref          0.0346 
_refine_ls_wR_factor_gt           0.0339 
_refine_ls_goodness_of_fit_ref    1.651 
_refine_ls_restrained_S_all       1.651 
_refine_ls_shift/su_max           0.000 
_refine_ls_shift/su_mean          0.000 
 
loop_ 
 _atom_site_label 
 _atom_site_type_symbol 
 _atom_site_fract_x 
 _atom_site_fract_y 
 _atom_site_fract_z 
 _atom_site_U_iso_or_equiv 
 _atom_site_adp_type 
 _atom_site_occupancy 
 _atom_site_symmetry_multiplicity 
 _atom_site_calc_flag 
 _atom_site_refinement_flags 
 _atom_site_disorder_assembly 
 _atom_site_disorder_group 
U1 U 0.7500 0.2500 0.7500 0.00543(6) Uani 1 8 d S . . 
Ba1 Ba 0.7500 0.2500 0.115485(14) 0.00676(6) Uani 1 4 d S . . 
S1 S 0.2500 0.55774(12) 0.08342(4) 0.00808(12) Uani 1 2 d S . . 
S2 S 0.2500 0.2500 0.27409(6) 0.00802(15) Uani 1 4 d S . . 
 
loop_ 
 _atom_site_aniso_label 
 _atom_site_aniso_U_11 
 _atom_site_aniso_U_22 
 _atom_site_aniso_U_33 
 _atom_site_aniso_U_23 
 _atom_site_aniso_U_13 
 _atom_site_aniso_U_12 
U1 0.00518(7) 0.00518(7) 0.00592(9) 0.000 0.000 0.000 
Ba1 0.00649(10) 0.00618(10) 0.00762(10) 0.000 0.000 0.000 
S1 0.0073(3) 0.0072(3) 0.0097(2) -0.0005(2) 0.000 0.000 
S2 0.0091(4) 0.0067(4) 0.0083(3) 0.000 0.000 0.000 
 
_geom_special_details 
; 
 All esds (except the esd in the dihedral angle between two l.s. planes) 
 are estimated using the full covariance matrix.  The cell esds are taken 
 into account individually in the estimation of esds in distances, angles 
 and torsion angles; correlations between esds in cell parameters are only 
 used when they are defined by crystal symmetry.  An approximate (isotropic) 
 treatment of cell esds is used for estimating esds involving l.s. planes. 
; 
 
loop_ 
 _geom_bond_atom_site_label_1 
 _geom_bond_atom_site_label_2 
 _geom_bond_distance 
 _geom_bond_site_symmetry_2 
 _geom_bond_publ_flag 
U1 S2 2.73366(17) 3_655 ? 
U1 S2 2.73366(17) 9_656 ? 
U1 S2 2.73366(17) 3 ? 
U1 S2 2.73366(17) 9_666 ? 
U1 S1 2.8199(7) 4 ? 
U1 S1 2.8199(7) 9_666 ? 
U1 S1 2.8199(7) 3_655 ? 
U1 S1 2.8199(7) 10_656 ? 
U1 Ba1 4.37456(17) 9_766 ? 
U1 Ba1 4.37456(17) 3_545 ? 
U1 Ba1 4.37456(17) 9_656 ? 
U1 Ba1 4.37456(17) 3_655 ? 
Ba1 S2 3.2167(6) 11_666 ? 
Ba1 S2 3.2167(6) 11_656 ? 
Ba1 S1 3.2187(4) 2 ? 
Ba1 S1 3.2187(4) 1_655 ? 
Ba1 S1 3.2187(4) 2_655 ? 
Ba1 S1 3.2187(4) . ? 
Ba1 S1 3.2978(7) 10_655 ? 
Ba1 S1 3.2978(7) 9_665 ? 
Ba1 S2 3.6818(7) . ? 
Ba1 S2 3.6818(7) 1_655 ? 
Ba1 Ba1 4.2324(5) 11_666 ? 
Ba1 U1 4.37456(16) 9_766 ? 
S1 S1 2.0820(13) 2_565 ? 
S1 U1 2.8199(7) 9_666 ? 
S1 Ba1 3.2187(4) 1_455 ? 
S1 Ba1 3.2978(7) 9_665 ? 
S2 U1 2.73365(17) 9_656 ? 
S2 U1 2.73365(17) 9_666 ? 
S2 Ba1 3.2167(6) 11_666 ? 
S2 Ba1 3.2167(6) 11_566 ? 
S2 Ba1 3.6817(7) 1_455 ? 
 
loop_ 
 _geom_angle_atom_site_label_1 
 _geom_angle_atom_site_label_2 
 _geom_angle_atom_site_label_3 
 _geom_angle 
 _geom_angle_site_symmetry_1 
 _geom_angle_site_symmetry_3 
 _geom_angle_publ_flag 
S2 U1 S2 91.102(6) 3_655 9_656 ? 
S2 U1 S2 164.06(4) 3_655 3 ? 
S2 U1 S2 91.102(6) 9_656 3 ? 
S2 U1 S2 91.102(6) 3_655 9_666 ? 
S2 U1 S2 164.06(4) 9_656 9_666 ? 
S2 U1 S2 91.102(6) 3 9_666 ? 
S2 U1 S1 119.63(2) 3_655 4 ? 
S2 U1 S1 82.596(19) 9_656 4 ? 
S2 U1 S1 76.31(2) 3 4 ? 
S2 U1 S1 82.596(19) 9_666 4 ? 
S2 U1 S1 82.596(19) 3_655 9_666 ? 
S2 U1 S1 119.63(2) 9_656 9_666 ? 
S2 U1 S1 82.596(19) 3 9_666 ? 
S2 U1 S1 76.31(2) 9_666 9_666 ? 
S1 U1 S1 149.736(19) 4 9_666 ? 
S2 U1 S1 76.31(2) 3_655 3_655 ? 
S2 U1 S1 82.596(19) 9_656 3_655 ? 
S2 U1 S1 119.63(2) 3 3_655 ? 
S2 U1 S1 82.596(19) 9_666 3_655 ? 
S1 U1 S1 43.33(3) 4 3_655 ? 
S1 U1 S1 149.736(19) 9_666 3_655 ? 
S2 U1 S1 82.596(19) 3_655 10_656 ? 
S2 U1 S1 76.31(2) 9_656 10_656 ? 
S2 U1 S1 82.596(19) 3 10_656 ? 
S2 U1 S1 119.63(2) 9_666 10_656 ? 
S1 U1 S1 149.736(19) 4 10_656 ? 
S1 U1 S1 43.33(3) 9_666 10_656 ? 
S1 U1 S1 149.736(19) 3_655 10_656 ? 
S2 U1 Ba1 47.159(11) 3_655 9_766 ? 
S2 U1 Ba1 132.841(11) 9_656 9_766 ? 
S2 U1 Ba1 123.080(14) 3 9_766 ? 
S2 U1 Ba1 56.920(14) 9_666 9_766 ? 
S1 U1 Ba1 132.691(8) 4 9_766 ? 
S1 U1 Ba1 47.309(8) 9_666 9_766 ? 
S1 U1 Ba1 102.775(11) 3_655 9_766 ? 
S1 U1 Ba1 77.225(11) 10_656 9_766 ? 
S2 U1 Ba1 132.841(11) 3_655 3_545 ? 
S2 U1 Ba1 47.159(11) 9_656 3_545 ? 
S2 U1 Ba1 56.920(14) 3 3_545 ? 
S2 U1 Ba1 123.080(14) 9_666 3_545 ? 
S1 U1 Ba1 47.309(8) 4 3_545 ? 
S1 U1 Ba1 132.691(8) 9_666 3_545 ? 
S1 U1 Ba1 77.225(11) 3_655 3_545 ? 
S1 U1 Ba1 102.775(11) 10_656 3_545 ? 
Ba1 U1 Ba1 180.0 9_766 3_545 ? 
S2 U1 Ba1 123.080(14) 3_655 9_656 ? 
S2 U1 Ba1 56.920(14) 9_656 9_656 ? 
S2 U1 Ba1 47.159(11) 3 9_656 ? 
S2 U1 Ba1 132.841(11) 9_666 9_656 ? 
S1 U1 Ba1 102.775(11) 4 9_656 ? 
S1 U1 Ba1 77.225(11) 9_666 9_656 ? 
S1 U1 Ba1 132.691(8) 3_655 9_656 ? 
S1 U1 Ba1 47.309(8) 10_656 9_656 ? 
Ba1 U1 Ba1 122.138(6) 9_766 9_656 ? 
Ba1 U1 Ba1 57.862(6) 3_545 9_656 ? 
S2 U1 Ba1 56.920(14) 3_655 3_655 ? 
S2 U1 Ba1 123.080(14) 9_656 3_655 ? 
S2 U1 Ba1 132.841(11) 3 3_655 ? 
S2 U1 Ba1 47.159(11) 9_666 3_655 ? 
S1 U1 Ba1 77.225(11) 4 3_655 ? 
S1 U1 Ba1 102.775(11) 9_666 3_655 ? 
S1 U1 Ba1 47.309(8) 3_655 3_655 ? 
S1 U1 Ba1 132.691(8) 10_656 3_655 ? 
Ba1 U1 Ba1 57.862(6) 9_766 3_655 ? 
Ba1 U1 Ba1 122.138(5) 3_545 3_655 ? 
Ba1 U1 Ba1 180.0 9_656 3_655 ? 
S2 Ba1 S2 114.63(3) 11_666 11_656 ? 
S2 Ba1 S1 121.355(11) 11_666 2 ? 
S2 Ba1 S1 69.448(13) 11_656 2 ? 
S2 Ba1 S1 69.448(13) 11_666 1_655 ? 
S2 Ba1 S1 121.355(11) 11_656 1_655 ? 
S1 Ba1 S1 161.97(3) 2 1_655 ? 
S2 Ba1 S1 121.355(11) 11_666 2_655 ? 
S2 Ba1 S1 69.448(13) 11_656 2_655 ? 
S1 Ba1 S1 114.51(2) 2 2_655 ? 
S1 Ba1 S1 62.35(2) 1_655 2_655 ? 
S2 Ba1 S1 69.448(13) 11_666 . ? 
S2 Ba1 S1 121.355(11) 11_656 . ? 
S1 Ba1 S1 62.35(2) 2 . ? 
S1 Ba1 S1 114.51(2) 1_655 . ? 
S1 Ba1 S1 161.97(3) 2_655 . ? 
S2 Ba1 S1 141.088(19) 11_666 10_655 ? 
S2 Ba1 S1 104.286(19) 11_656 10_655 ? 
S1 Ba1 S1 71.813(14) 2 10_655 ? 
S1 Ba1 S1 90.842(11) 1_655 10_655 ? 
S1 Ba1 S1 71.813(14) 2_655 10_655 ? 
S1 Ba1 S1 90.842(11) . 10_655 ? 
S2 Ba1 S1 104.286(19) 11_666 9_665 ? 
S2 Ba1 S1 141.088(19) 11_656 9_665 ? 
S1 Ba1 S1 90.842(11) 2 9_665 ? 
S1 Ba1 S1 71.813(14) 1_655 9_665 ? 
S1 Ba1 S1 90.842(11) 2_655 9_665 ? 
S1 Ba1 S1 71.812(14) . 9_665 ? 
S1 Ba1 S1 36.80(2) 10_655 9_665 ? 
S2 Ba1 S2 68.530(5) 11_666 . ? 
S2 Ba1 S2 68.530(5) 11_656 . ? 
S1 Ba1 S2 59.186(15) 2 . ? 
S1 Ba1 S2 136.443(15) 1_655 . ? 
S1 Ba1 S2 136.443(15) 2_655 . ? 
S1 Ba1 S2 59.186(15) . . ? 
S1 Ba1 S2 130.021(11) 10_655 . ? 
S1 Ba1 S2 130.021(11) 9_665 . ? 
S2 Ba1 S2 68.530(5) 11_666 1_655 ? 
S2 Ba1 S2 68.530(5) 11_656 1_655 ? 
S1 Ba1 S2 136.443(15) 2 1_655 ? 
S1 Ba1 S2 59.186(15) 1_655 1_655 ? 
S1 Ba1 S2 59.186(15) 2_655 1_655 ? 
S1 Ba1 S2 136.443(15) . 1_655 ? 
S1 Ba1 S2 130.022(11) 10_655 1_655 ? 
S1 Ba1 S2 130.022(11) 9_665 1_655 ? 
S2 Ba1 S2 94.67(2) . 1_655 ? 
S2 Ba1 Ba1 57.313(15) 11_666 11_666 ? 
S2 Ba1 Ba1 57.313(15) 11_656 11_666 ? 
S1 Ba1 Ba1 99.017(13) 2 11_666 ? 
S1 Ba1 Ba1 99.017(13) 1_655 11_666 ? 
S1 Ba1 Ba1 99.017(13) 2_655 11_666 ? 
S1 Ba1 Ba1 99.017(13) . 11_666 ? 
S1 Ba1 Ba1 161.599(12) 10_655 11_666 ? 
S1 Ba1 Ba1 161.599(12) 9_665 11_666 ? 
S2 Ba1 Ba1 47.334(12) . 11_666 ? 
S2 Ba1 Ba1 47.333(12) 1_655 11_666 ? 
S2 Ba1 U1 38.546(2) 11_666 9_766 ? 
S2 Ba1 U1 105.046(12) 11_656 9_766 ? 
S1 Ba1 U1 156.450(13) 2 9_766 ? 
S1 Ba1 U1 40.086(12) 1_655 9_766 ? 
S1 Ba1 U1 82.858(10) 2_655 9_766 ? 
S1 Ba1 U1 106.020(11) . 9_766 ? 
S1 Ba1 U1 130.872(7) 10_655 9_766 ? 
S1 Ba1 U1 105.288(9) 9_665 9_766 ? 
S2 Ba1 U1 97.308(10) . 9_766 ? 
S2 Ba1 U1 38.472(2) 1_655 9_766 ? 
Ba1 Ba1 U1 61.069(3) 11_666 9_766 ? 
S1 S1 U1 68.335(14) 2_565 9_666 ? 
S1 S1 Ba1 121.177(10) 2_565 . ? 
U1 S1 Ba1 92.605(15) 9_666 . ? 
S1 S1 Ba1 121.177(10) 2_565 1_455 ? 
U1 S1 Ba1 92.604(15) 9_666 1_455 ? 
Ba1 S1 Ba1 114.51(2) . 1_455 ? 
S1 S1 Ba1 71.600(12) 2_565 9_665 ? 
U1 S1 Ba1 139.94(2) 9_666 9_665 ? 
Ba1 S1 Ba1 108.188(14) . 9_665 ? 
Ba1 S1 Ba1 108.188(14) 1_455 9_665 ? 
U1 S2 U1 164.06(4) 9_656 9_666 ? 
U1 S2 Ba1 94.294(9) 9_656 11_666 ? 
U1 S2 Ba1 94.294(9) 9_666 11_666 ? 
U1 S2 Ba1 94.294(9) 9_656 11_566 ? 
U1 S2 Ba1 94.294(9) 9_666 11_566 ? 
Ba1 S2 Ba1 114.62(3) 11_666 11_566 ? 
U1 S2 Ba1 84.609(15) 9_656 1_455 ? 
U1 S2 Ba1 84.609(15) 9_666 1_455 ? 
Ba1 S2 Ba1 170.02(3) 11_666 1_455 ? 
Ba1 S2 Ba1 75.354(7) 11_566 1_455 ? 
U1 S2 Ba1 84.609(15) 9_656 . ? 
U1 S2 Ba1 84.609(15) 9_666 . ? 
Ba1 S2 Ba1 75.354(7) 11_666 . ? 
Ba1 S2 Ba1 170.02(3) 11_566 . ? 
Ba1 S2 Ba1 94.67(2) 1_455 . ? 
 
_diffrn_measured_fraction_theta_max    1.000 
_diffrn_reflns_theta_full              36.36 
_diffrn_measured_fraction_theta_full   1.000 
_refine_diff_density_max    1.344 
_refine_diff_density_min   -0.797 
_refine_diff_density_rms    0.179 
